# Supplementary material for: Migration and Regional Wage Disparities in Germany
Source: publisher site journal article supplement (doi:10.1515/jbnst-2015-1001), 2016-02-01
Supplement: Supplementary file 1 [file jbnst-2015-1001ad.zip]

Figure 2 Negative and positive wage effects of migration

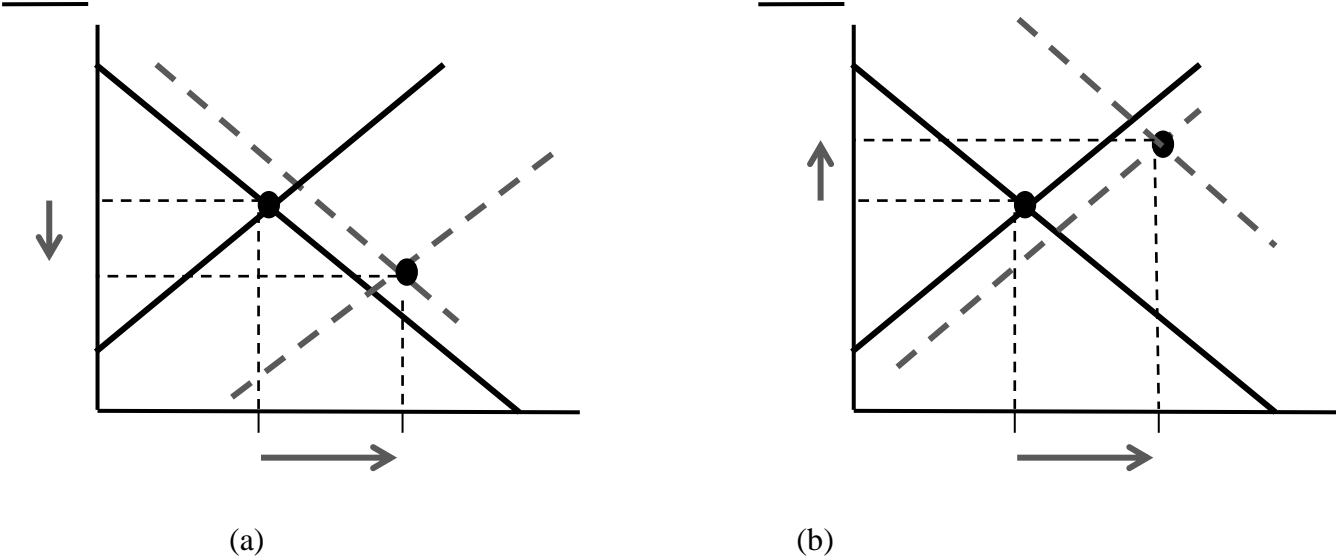

Figure 3 ROR average net hourly wages for 1998-2009 over nuts1

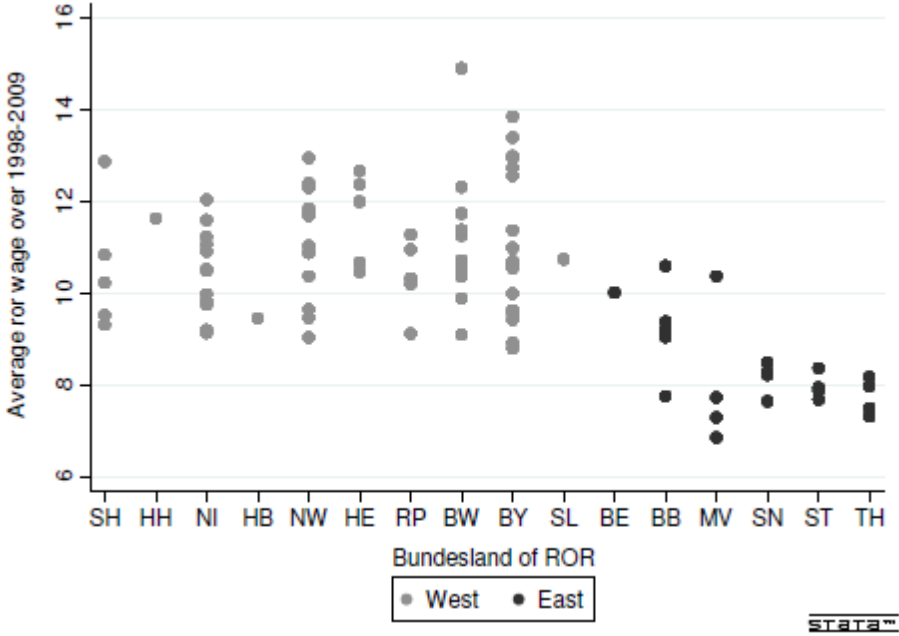

Source: SOEP

Figure 4 ROR average unemployment rates for 1998-2009 over nuts1

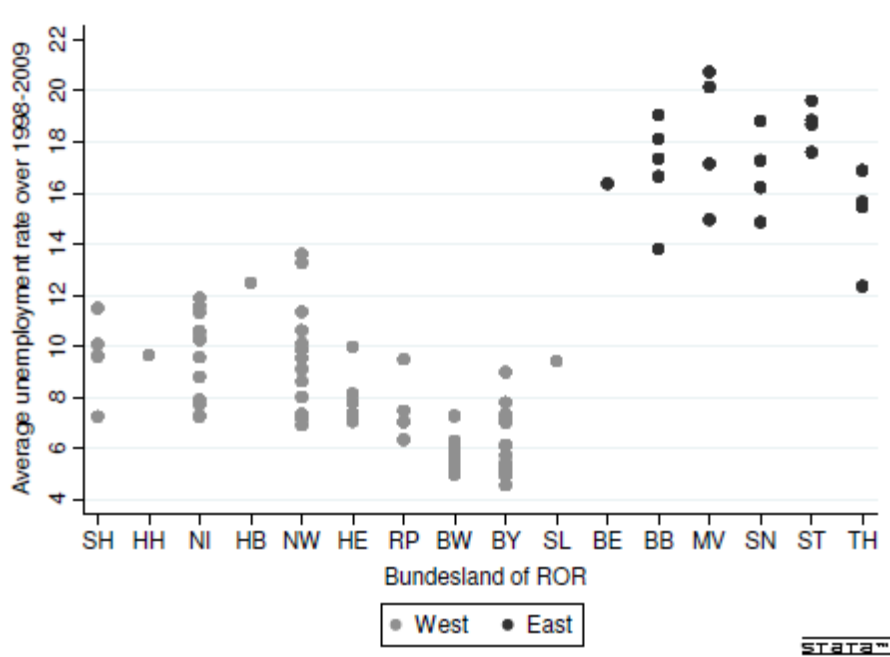

Source: INKAR

Figure 5 Yearly change of the migration balance by years

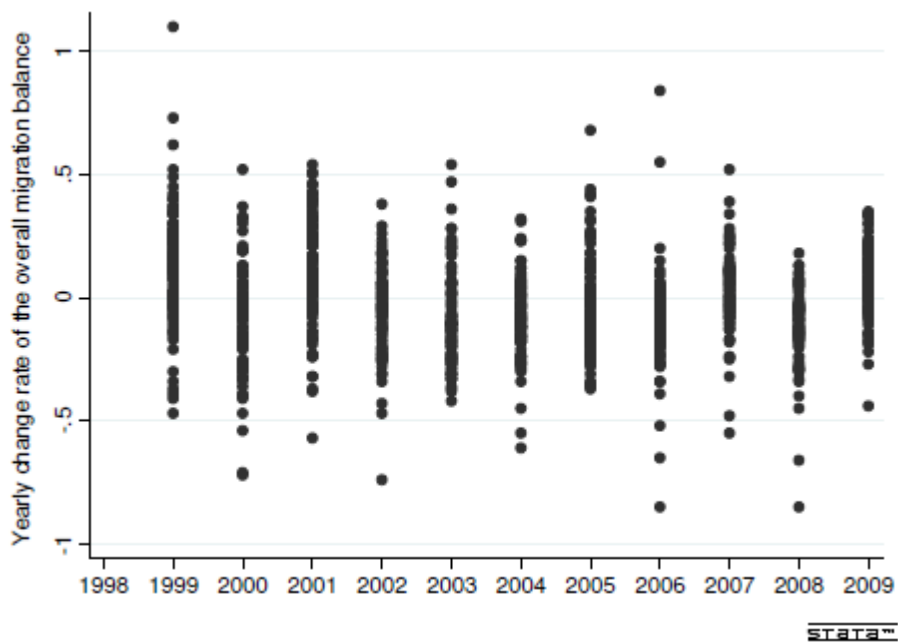

Source: INKAR

Figure 6 Scatter diagram relating relative wage levels and regional migration balances

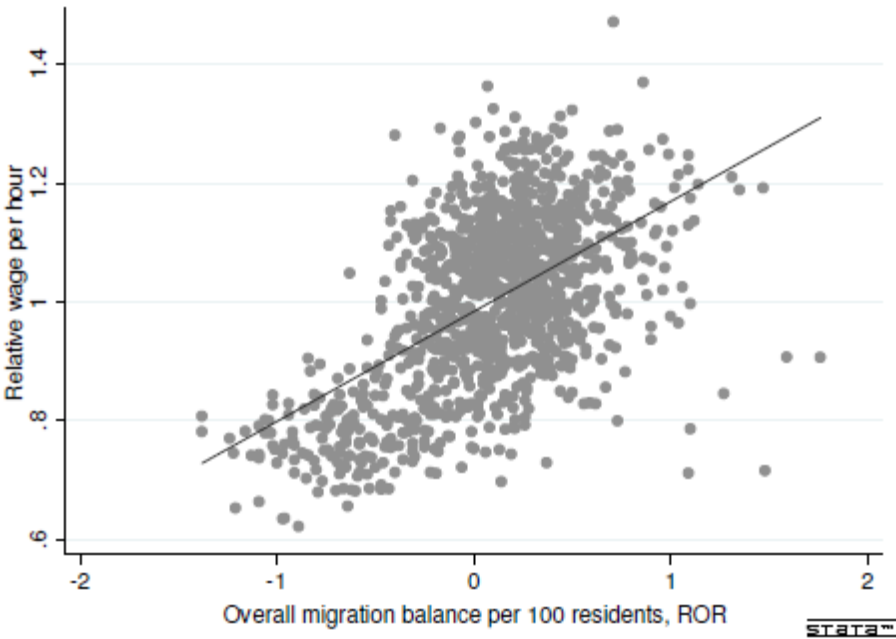

Source: INKAR, SOEP

**Table 5**                      **Regions for which increasing disparities due to migration can be expected**

| Increases of over-average wage levels |                               | Decreases of under-average wage levels |                              |
|---------------------------------------|-------------------------------|----------------------------------------|------------------------------|
| ROR                                   | Nuts1                         | ROR                                    | Nuts1                        |
| <b>201</b>                            | <b>Hamburg</b>                | 102                                    | Schleswig-Holstein Nord      |
| 305                                   | Göttingen                     | 103                                    | Schleswig-Holstein Ost       |
| 307                                   | Hannover                      | 302                                    | Bremen-Umland                |
| 507                                   | Duisburg/Essen                | 303                                    | Bremerhaven                  |
| 508                                   | Düsseldorf                    | 304                                    | Emsland                      |
| 510                                   | Köln                          | 310                                    | Oldenburg                    |
| 604                                   | Rhein-Main                    | 312                                    | Ost-Friesland                |
| 605                                   | Starkenburger                 | 313                                    | Südheide                     |
| <b>806</b>                            | <b>Neckar-Alb</b>             | 502                                    | Arnsberg                     |
| <b>812</b>                            | <b>Rhein-Neckar</b>           | 506                                    | Dortmund                     |
| 906                                   | Industrieregion Mittelfranken | 512                                    | Paderborn                    |
| <b>910</b>                            | <b>München</b>                | 701                                    | Mittelrhein-Westerwald       |
| 1001                                  | Saar                          | 702                                    | Rheinhessen-Nahe             |
|                                       |                               | 704                                    | Trier                        |
|                                       |                               | 807                                    | Nordschwarzwald              |
|                                       |                               | 809                                    | Schwarzwald-Baar-Heuberg     |
|                                       |                               | 811                                    | Südlicher Oberrhein          |
|                                       |                               | 901                                    | Allgäu                       |
|                                       |                               | 902                                    | Augsburg                     |
|                                       |                               | 905                                    | Donau-Wald                   |
|                                       |                               | 908                                    | Landshut                     |
|                                       |                               | 911                                    | Oberfranken-Ost              |
|                                       |                               | 917                                    | Westmittelfranken            |
|                                       |                               | 1202                                   | Lausitz-Spreewald            |
|                                       |                               | <b>1203</b>                            | <b>Oderland-Spree</b>        |
|                                       |                               | <b>1204</b>                            | <b>Prignitz-Oberhavel</b>    |
|                                       |                               | <b>1205</b>                            | <b>Uckermark-Barnim</b>      |
|                                       |                               | 1301                                   | Mecklenburgische Seenplatte  |
|                                       |                               | 1304                                   | Westmecklenburg              |
|                                       |                               | 1402                                   | Oberlausitz-Niederschlesien  |
|                                       |                               | 1403                                   | Südsachsen                   |
|                                       |                               | 1502                                   | Anhalt-Bitterfeld-Wittenberg |
|                                       |                               | 1503                                   | Halle (Saale)                |
|                                       |                               | 1601                                   | Mittelthüringen              |
|                                       |                               | 1602                                   | Nordthüringen                |
|                                       |                               | 1603                                   | Ostthüringen                 |
|                                       |                               | 1604                                   | Südthüringen                 |

Notes: Increases of over-average wage levels: for the years 1998-2009 the average relative wage level is larger than 1 and the average yearly growth of the migration balance is above 0.

Declines of under-average wage levels: the average relative wage rate is smaller than 1 while the average growth of the migration balance is negative.

Regions with an ROR > 1101 belong to the eastern part of Germany

**Table 6** Estimation results for wage equations – Difference GMM and System GMM estimation for the 1. Specification using 4 lags

|                        | <b>Reg. 1</b><br><i>(DIFF, 4 lags)</i> | <b>Reg. 2</b><br><i>(SYSTEM, 4 lags)</i> |
|------------------------|----------------------------------------|------------------------------------------|
| ln(Rel. wage (t-1))    | 0.3830***<br>(0.0783)                  | 0.6359***<br>(0.0627)                    |
| Rel. Unempl. Rate      | 0.0174<br>(0.0591)                     | -0.0225<br>(0.0269)                      |
| MigB                   | 0.0096<br>(0.0207)                     | 0.0421***<br>(0.0145)                    |
| ComB                   | 0.0019<br>(0.0033)                     | 0.0006<br>(0.0008)                       |
| Additional Controlvar. | √                                      | √                                        |
| Year dummies           | √                                      | √                                        |
| Obs                    | 950                                    | 1045                                     |
| Regions                | 95                                     | 95                                       |
| Instruments            | 169                                    | 215                                      |
| AR 1                   | 0.000                                  | 0.000                                    |
| AR 2                   | 0.473                                  | 0.214                                    |
| Hansen                 | 1.000                                  | 1.000                                    |
| Difference- Hansen (1) |                                        | 1.000                                    |
| Difference- Hansen (2) | 1.000                                  | 1.000                                    |

Notes: see Table 2.

**Table 7** Estimation results for wage equations – Difference GMM and System GMM estimation for the 2. Specification using 4 lags

|                        | <b>Reg. 3</b><br><i>(DIFF, 4 lags)</i> | <b>Reg. 4</b><br><i>(SYSTEM, 4 lags)</i> |
|------------------------|----------------------------------------|------------------------------------------|
| ln(Rel. wage (t-1))    | 0.3599***<br>(0.0650)                  | 0.6755***<br>(0.0508)                    |
| Rel. Unempl. Rate      | -0.0042<br>(0.0527)                    | -0.0413**<br>(0.0199)                    |
| DomMigB                | -0.0055***<br>(0.0013)                 | 0.0003<br>(0.0021)                       |
| ComB                   | -0.0011<br>(0.0033)                    | 0.0006<br>(0.0006)                       |
| Additional Controlvar. | √                                      | √                                        |
| Year dummies           | √                                      | √                                        |
| Obs                    | 950                                    | 1045                                     |
| Regions                | 95                                     | 95                                       |
| Instruments            | 169                                    | 215                                      |
| AR 1                   | 0.000                                  | 0.000                                    |
| AR 2                   | 0.512                                  | 0.163                                    |
| Hansen                 | 1.000                                  | 1.000                                    |
| Difference- Hansen (1) |                                        | 1.000                                    |
| Difference- Hansen (2) | 1.000                                  | 1.000                                    |

Notes: see Table 2.

**Table 8** Estimation results for migration equations – Difference GMM and System GMM estimation using 4 lags

|                        | <b>Reg. 5</b>          | <b>Reg. 6</b>           |
|------------------------|------------------------|-------------------------|
|                        | <i>(DIFF, 4 lags)</i>  | <i>(SYSTEM, 4 lags)</i> |
| DomMigB (t-1)          | 0.9137***<br>(0.0415)  | 0.9133***<br>(0.0150)   |
| ln(Rel. Wage)          | -0.1630<br>(0.2412)    | 0.1280<br>(0.1286)      |
| rel. Unempl.           | -1.0040***<br>(0.3051) | -0.0182<br>(0.0356)     |
| Rents                  | -0.5308***<br>(0.1990) | 0.0098<br>(0.0231)      |
| Year dummies           | √                      | √                       |
| Obs.                   | 950                    | 1045                    |
| Regions                | 95                     | 95                      |
| Instruments            | 131                    | 167                     |
| AR 1                   | 0.003                  | 0.001                   |
| AR 2                   | 0.268                  | 0.249                   |
| Hansen                 | 0.985                  | 1.000                   |
| Difference- Hansen (1) |                        | 1.000                   |
| Difference- Hansen (2) | 1.000                  | 1.000                   |

Notes see Table 2.
