# Supplementary material for: Migration and Regional Wage Disparities in Germany
Source: publisher site journal article supplement (doi:10.1515/jbnst-2015-1001), 2016-02-01
Supplement: Supplementary file 2 [file jbnst-2015-1001ad.zip]

## readme.txt

Migration and regional Labor Market Disparities in Germany  
Tanja Fendel

The study provides an analysis of the effect of migration and commuting on regional wage disparities.

For the analysis most variables are taken from the INKAR dataset.  
(INKAR 2009, BBSR Bonn)

Average wages on ROR level are calculated using the SOEP regional data.  
(SOEP 2009, DIW Berlin)

Average rents on ROR level are calculated using data on BBSR-housing market observations on county level.  
(BBSR-Wohnungsmarktbeobachtungssystem, IDN ImmoDaten GmbH)

Attached are the following files

- analysis.txt  
Text-file  
Documentation of data preparation and analysis

- data description.txt  
Text-file  
Number of observation and variables  
List of variables

- data.txt  
Text-file  
Data
